# Supplementary material
Source: publisher figshare collection journal article supplement (https://tandf.figshare.com/ndownloader/files/5225512)
Supplement: Supplementary file 1 [file 5225512]

## **Micro-spherical cochleate composites: method development for monodispersed cochleate system**

Kalpa Nagarsekar<sup>1\*</sup>, Mukul Ashtikar<sup>1\*</sup>, Frank Steiniger<sup>2</sup>, Jana Thamm<sup>1</sup>, Felix H. Schacher<sup>3,4</sup>, Alfred Fahr<sup>1\*\*</sup>

<sup>1</sup> Lehrstuhl für Pharmazeutische Technologie, Institut für Pharmazie, Friedrich-Schiller-Universität Jena, Lessingstraße 8, 07743 Jena, Germany

<sup>2</sup> Elektronenmikroskopisches Zentrum, Universitätsklinikum Jena, Ziegmühlenweg 1, 07743 Jena, Germany

<sup>3</sup>Institut für Organische Chemie und Makromolekulare Chemie, Friedrich-Schiller-Universität Jena, Lessingstraße 8, 07743 Jena, Germany

<sup>4</sup> Jena Center for Soft Matter, Friedrich-Schiller-Universität Jena, Philosophenweg 7, 07743 Jena, Germany

\*These authors have contributed equally in this study and in the preparation of this manuscript.

\*\*Corresponding Author:

**Prof Dr Alfred Fahr,**  
Lehrstuhl für Pharmazeutische Technologie,  
Institut für Pharmazie,  
Friedrich-Schiller-Universität Jena,  
Lessingstraße 8,  
07743 Jena, Germany  
Phone: +49 3641 949901  
Email: Alfred.Fahr@uni-jena.de

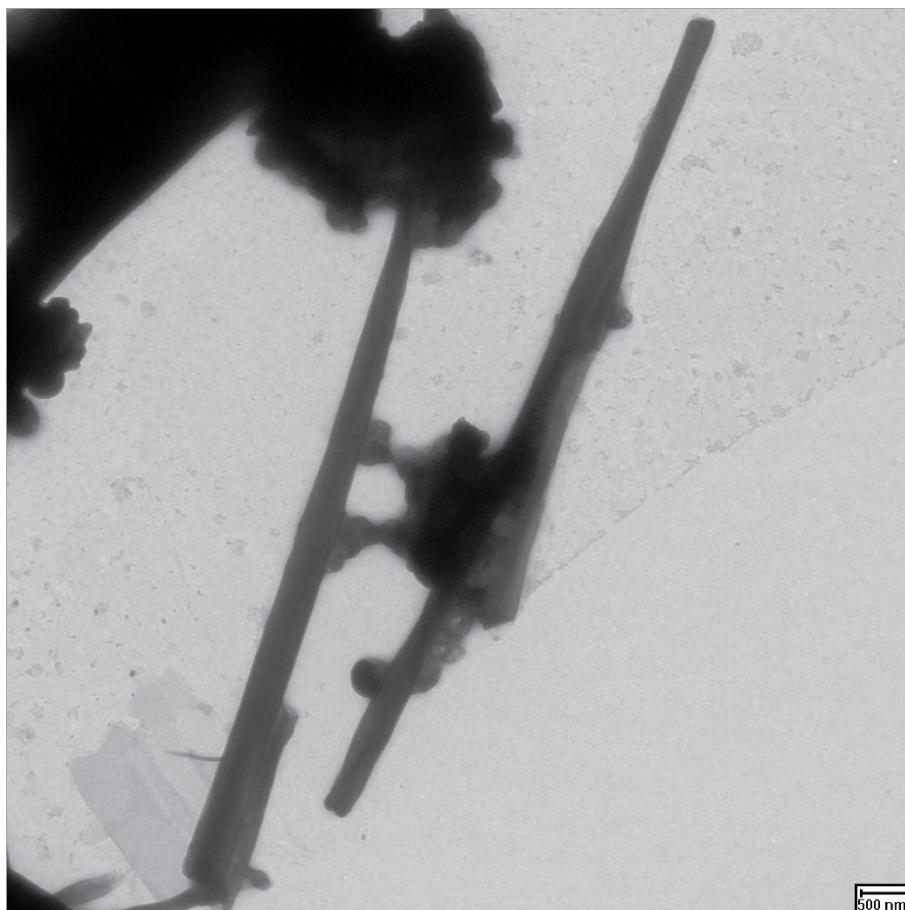

**Figure S1:** TEM micrograph showing long cylindrical cochleates. Sample was prepared in NanoAssemblr™ by mixing the  $\text{CaCl}_2$  buffer (in 10 mM Tris) solution with DOPS liposomes (1 mg/ml) extruded through 100 nm polycarbonate membrane. Long cylindrical cochleate particles were prepared when DOPS was precipitated in complete absence of ethanol. Flow rate was 6 ml/min and mixing ratio for the two streams was 1:1.

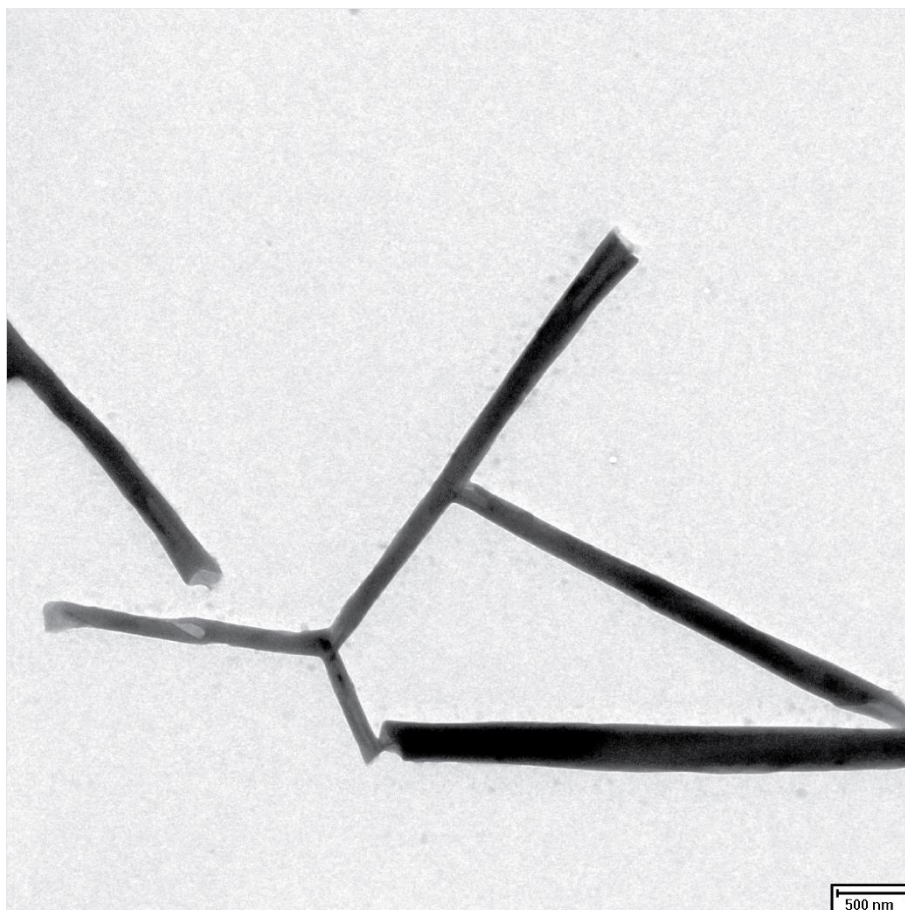

**Figure S2:** Long cylindrical cochleates observed when high aqueous component was used in the mixture. Ratio of  $\text{CaCl}_{2(\text{aqueous})}$  :  $\text{DOPS}_{(\text{ethanolic})}$  (3:1), mixing rate 12 ml/min and concentration of ethanolic DOPS was 1 mg/ml.

## Supplementary material

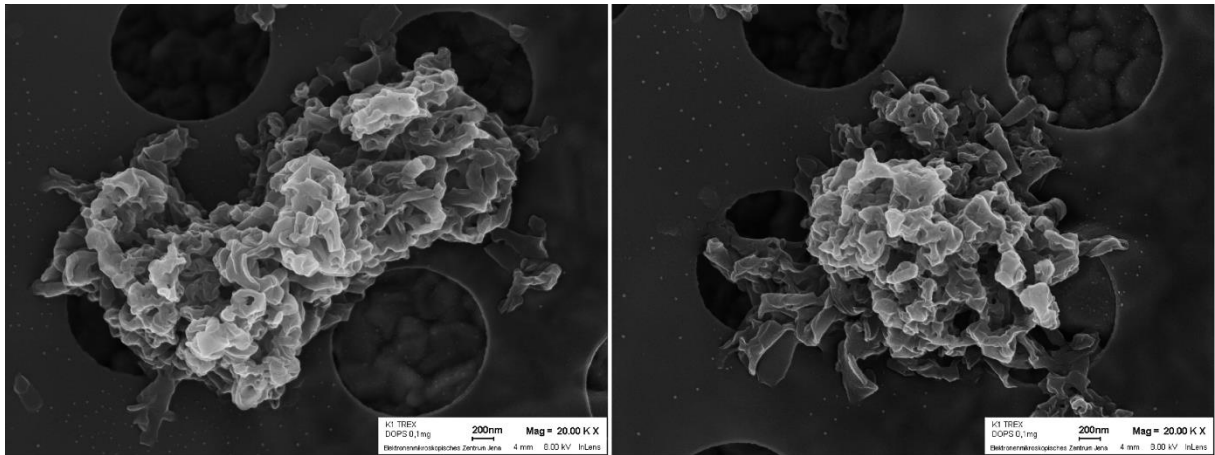

**Figure S3:** Cochleate composites prepared using the modified trapping method (using T-25 Ultra-Turrax® homogenizer) showed irregular non-spherical morphology.

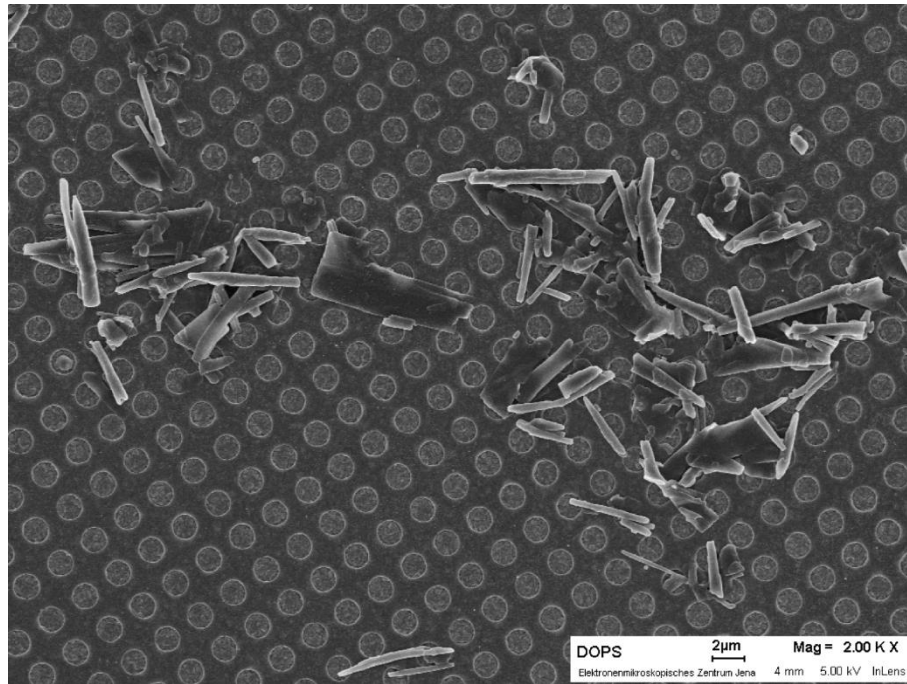

**Figure S4:** SEM micrograph showing an overview of the conventional DOPS cochleates prepared by trapping method.
